# Supplementary material for: Identification of Potential Distinguishing Markers for the Use of Cannabis-Based Medicines or Street Cannabis in Serum Samples
Source: MDPI journal article supplement (doi:10.3390/metabo11050316), 2021-05-13
Supplement: s1 [file s1]

*Supplementary Material*

# Identification of potential distinguishing markers for the use of cannabis-based medicines or street cannabis in serum samples

Anne Scheunemann <sup>1,\*</sup>, Katrin Elsner <sup>1</sup>, Tanja Germerott <sup>1</sup>, Sergiu Groppa <sup>2</sup>, Cornelius Hess <sup>1</sup>, Isabelle Miederer <sup>3</sup>, Alicia Poplawski <sup>4</sup> and Jörg Röhrich <sup>1</sup>

<sup>1</sup> Institute of Legal Medicine, University Medical Center of the Johannes Gutenberg University Mainz, 55131 Mainz, Germany

<sup>2</sup> Department of Neurology, University Medical Center of the Johannes Gutenberg University Mainz, 55131 Mainz, Germany

<sup>3</sup> Department of Nuclear Medicine, University Medical Center of the Johannes Gutenberg University Mainz, 55131 Mainz, Germany

<sup>4</sup> Institute of Medical Biostatistics, Epidemiology and Informatics, University Medical Center of the Johannes Gutenberg University Mainz, 55131 Mainz, Germany

\* Correspondence: [anne.scheunemann@uni-mainz.de](mailto:anne.scheunemann@uni-mainz.de)

**Table S1.** Demographic information on the study collective

| Sample | Gender | Age | BMI* | Substance intake   | Application | Dosing regimen per day                                  | Approx. daily dose of THC [mg]**                         | Last dose before blood draw<br>(respective THC quantity) | Time between last<br>intake and blood draw |
|--------|--------|-----|------|--------------------|-------------|---------------------------------------------------------|----------------------------------------------------------|----------------------------------------------------------|--------------------------------------------|
| S01-01 | f*     | 61  | 24   | Sativex            | om*         | 8 sprays per day                                        | 21.6 mg                                                  | M.D.*                                                    | 2h 25min                                   |
| S01-02 | f      | 62  | 23   | Sativex            | om          | 3 - 0 - 3 sprays**                                      | 16.2 mg                                                  | 3 sprays (8.1 mg THC)                                    | 18h 20min                                  |
| S01-03 | f      | 62  | 23   | Sativex            | om          | 2 - 0 - 3 sprays                                        | 13.5 mg                                                  | 2 sprays (5.4 mg THC)                                    | 7h 15min                                   |
| S02-01 | m*     | 54  | 28   | Sativex            | om          | 12 sprays per day                                       | 32.4 mg                                                  | M.D.                                                     | 9h                                         |
| S02-02 | m      | 54  | 28   | Sativex            | om          | 6 to 8 sprays per day                                   | 16.2-21.6 mg                                             | 2 sprays (5.4 mg THC)                                    | 16h 15min                                  |
| S03-01 | f      | 55  | 28   | Sativex            | om          | 4 - 0 - 6 sprays                                        | 27 mg                                                    | 4 sprays (10.8 mg THC)                                   | 50 min                                     |
| S03-02 | f      | 56  | 29   | Sativex            | om          | 4 - 0 - 12 sprays                                       | 43.2 mg                                                  | 4 sprays (10.8 mg THC)                                   | 33 min                                     |
| S03-03 | f      | 56  | 29   | Sativex            | om          | 4 - 0 - 6 sprays                                        | 27 mg                                                    | 4 sprays (10.8 mg THC)                                   | 1h 24min                                   |
| S03-04 | f      | 56  | 29   | Sativex            | om          | 8 - 0 - 12 sprays                                       | 54 mg                                                    | 4 sprays (10.8 mg THC)                                   | 1h 5min                                    |
| S04-01 | f      | 51  | 24   | Sativex + Bedrocan | om, M.D.    | 0 - 0 - 2 to 3 sprays + unknown<br>quantity of Bedrocan | 5.4 to 8.1 mg + unknown quantity of<br>THC from Bedrocan | 2 to 3 sprays<br>(5.4 to 8.1 mg THC)                     | 10h 44min (Sativex)                        |
| S05-01 | m      | 55  | 37   | Sativex + Bedrocan | om, v*      | Sativex: 1 - 0 - 2 sprays,<br>Bedrocan: 500 mg at noon  | 118.1 mg (= 8.1 mg (Sativex)<br>+ 110 mg (Bedrocan))     | 2 sprays (5.4 mg THC)                                    | 13h 35min (Sativex)                        |
| S05-02 | m      | 55  | 36   | Sativex + Bedrocan | om, v       | Sativex: 1 - 0 - 2 sprays,<br>Bedrocan: 100 mg at noon  | 30.1 mg (= 8.1 mg (Sativex)<br>+ 22 mg (Bedrocan))       | 1 spray (2.7 mg THC)                                     | 2h 15min (Sativex)                         |
| S05-03 | m      | 55  | 35   | Sativex + Bedrocan | om, v       | Sativex: 1 - 0 - 2 sprays,<br>Bedrocan: 100 mg at noon  | 30.1 mg (= 8.1 mg (Sativex)<br>+ 22 mg (Bedrocan))       | 1 spray (2.7 mg THC)                                     | 1h 45min (Sativex)                         |
| S05-04 | m      | 55  | 35   | Sativex + Bedrocan | om, v       | Sativex: 1 - 0 - 3 sprays,<br>Bedrocan: 100 mg at noon  | 32.8 mg (= 10.8 mg (Sativex)<br>+ 22 mg (Bedrocan))      | 1 spray (2.7 mg THC)                                     | 3h 30min (Sativex)                         |
| S05-05 | m      | 55  | 34   | Sativex + Bedrocan | om, v       | Sativex: 1 - 0 - 3 sprays,<br>Bedrocan: 100 mg at noon  | 32.8 mg (= 10.8 mg (Sativex)<br>+ 22 mg (Bedrocan))      | 1 spray (2.7 mg THC)                                     | 2h 10min (Sativex)                         |
| S06-01 | m      | 27  | 22   | Bediol             | v           | 50 mg - 50 mg - 50 mg                                   | 9.45 mg                                                  | 50 mg (3.15mg THC)                                       | 3h 56min                                   |

Table S1. Cont.

| Sample | Gender | Age | BMI* | Substance intake          | Application | Dosing regimen per day                                                                 | Approx. daily dose of THC [mg]***                        | Last dose before blood draw (respective THC quantity) | Time between last intake and blood draw |
|--------|--------|-----|------|---------------------------|-------------|----------------------------------------------------------------------------------------|----------------------------------------------------------|-------------------------------------------------------|-----------------------------------------|
| S07-01 | m      | 58  | 25   | Bedrocan                  | s*, v       | 3 g (10 doses at 300 mg each)                                                          | 660 mg                                                   | 300 mg (66 mg THC)                                    | 1h 10min                                |
| S07-02 | m      | 58  | 24   | Bedrocan                  | s, v        | 2.5 to 3 g (10 doses at 250 to 300 mg each, every 2 to 3 hours)                        | 550 to 660 mg                                            | 250 to 300 mg (55 to 66 mg THC)                       | 1h 30min                                |
| S07-03 | m      | 58  | 23   | Bedrocan                  | v           | 2 to 2.5 g (10 doses at 200 to 250 mg each, every 2 hours)                             | 440 to 550 mg                                            | 200 to 250 mg (44 to 55 mg THC)                       | 2h 30min                                |
| S07-04 | m      | 59  | 23   | Bedrocan                  | v           | 2.5 g (10 doses at 250mg each)                                                         | 550 mg                                                   | 250 mg (55 mg THC)                                    | 1h 10min                                |
| S08-01 | f      | 36  | 54   | Bedrolite + Pedanios 22/1 | v           | 100 mg Bedrolite - 100 mg Bedrolite - 100 mg Pedanios 22/1                             | 23.98 mg (= 1.98 mg (Bedrolite) + 22 mg (Pedanios 22/1)) | 100mg Pedanios 22/1 (22mg THC)                        | 10h 10min (Pedanios 22/1)               |
| S08-02 | f      | 36  | 55   | Bedrolite + Bedrocan      | v           | 100 mg Bedrolite - 100 mg Bedrolite - 100 mg Bedrocan                                  | 23.98 mg (= 1.98 mg (Bedrolite) + 22 mg (Bedrocan))      | 100mg Bedrolite (0.99 mg THC)                         | 9h (Bedrolite)                          |
| S08-03 | f      | 36  | 54   | Bedrolite + Bedrocan      | v           | 70 mg Bedrolite - 70 mg Bedrolite - 70 mg Bedrocan                                     | 16.79 mg (= 1.39 mg (Bedrolite) + 15.4 mg (Bedrocan))    | 70mg Bedrolite (0.69 mg THC)                          | 2h 30min (Bedrolite)                    |
| S08-04 | f      | 36  | 54   | Bedrolite + Bedrocan      | v           | 100 mg Bedrocan - 0 - 100 mg Bedrolite (+ 100 mg Bedrocan before bedtime if necessary) | 44.99 mg (= 0.99 mg (Bedrolite) + 44 mg (Bedrocan))      | 100mg Bedrocan (22 mg THC)                            | 2h 30min (Bedrocan)                     |
| S09-01 | m      | 56  | 31   | Bedrocan                  | v           | 0 - 0 - 50 mg                                                                          | 11 mg                                                    | 50 mg (11 mg THC)                                     | 15h 26min                               |
| S09-02 | m      | 57  | M.D. | Bedrocan                  | v           | 0 - 0 - 50 mg + 50 mg before bedtime                                                   | 22 mg                                                    | 50 mg (11 mg THC)                                     | 10h 55min                               |
| S09-03 | m      | 57  | 28   | Bedrocan                  | v           | 50 mg every second day/ if necessary                                                   | 11 mg                                                    | 50 mg (11 mg THC)                                     | 1d 14h 50min                            |
| S10-01 | m      | 49  | 29   | Bedrobinol                | s           | 1 g (divided into 4 to 6 doses)                                                        | 135 mg                                                   | 166-250 mg (22.41-33.75 mg THC)                       | 4h 50min                                |
| S10-02 | m      | 50  | 30   | Bedrobinol                | s           | 1 g (divided into 4 to 6 doses)                                                        | 135 mg                                                   | 166-250 mg (22.41-33.75 mg THC)                       | 3h 20min                                |
| S10-03 | m      | 50  | 30   | Bedrobinol                | s           | 6 doses of 200 mg each                                                                 | 162 mg                                                   | 200 mg (27 mg THC)                                    | 1h 55min                                |
| S10-04 | m      | 50  | 30   | Bedrobinol                | s           | 4 to 6 doses of 200 mg each                                                            | 108 to 162 mg                                            | 200 mg (27 mg THC)                                    | 5d 14h 40min                            |

Table S1. Cont.

| Sample | Gender | Age | BMI* | Substance intake             | Application | Dosing regimen per day                                                  | Approx. daily dose of THC [mg]***                          | Last dose before blood draw (respective THC quantity) | Time between last intake and blood draw |
|--------|--------|-----|------|------------------------------|-------------|-------------------------------------------------------------------------|------------------------------------------------------------|-------------------------------------------------------|-----------------------------------------|
| S11-01 | m      | 23  | 23   | Dronabinol + Street cannabis | o*, s       | 6 - 6 - 6 drops of Dronabinol + 3-4 joints                              | 15.84 mg (Dronabinol) + unknown quantity of THC (joint)    | 6 drops (5.28 mg THC)                                 | 6h 34min (Dronabinol)                   |
| S11-02 | m      | 23  | 23   | Dronabinol + Street cannabis | o, s        | 6 - 6 - 6 drops of Dronabinol + unknown number of joints                | 15.84 mg (Dronabinol) + unknown quantity of THC (joint)    | 6 drops (5.28 mg THC)                                 | 8h 19min (Dronabinol)                   |
| S11-03 | m      | 23  | 22   | Dronabinol + Street cannabis | o, s        | unknown number of joints                                                | M.D.                                                       | M.D.                                                  | approx. 4.5d (Dronabinol)               |
| S11-04 | m      | 23  | 21   | Dronabinol + Street cannabis | o, s        | 1 joint - 1 joint - 1 joint, Dronabinol intake discontinued for 11 days | M.D.                                                       | 1 joint (M.D.)                                        | 12h 50min (joint)                       |
| S12-01 | m      | 58  | 24   | Dronabinol + Street cannabis | o, s        | 10 - 10 - 10 drops of Dronabinol + 3 joints                             | 26.4 mg (Dronabinol) + unknown quantity of THC (joint)     | 10 drops (8.8 mg THC)                                 | 3h (Dronabinol)                         |
| S12-02 | m      | 58  | 25   | Dronabinol + Street cannabis | o, v        | 12 - 12 - 15 drops of Dronabinol + unknown quantity of cannabis         | 34.32 mg (Dronabinol) + unknown quantity of THC (cannabis) | 12 drops (10.56 mg THC)                               | 2h 47min (Dronabinol)                   |
| S13-01 | f      | 75  | 29   | Dronabinol                   | o           | 3 - 0 - 3 drops                                                         | 5.28 mg                                                    | 5 drops (4.4 mg THC)                                  | 7h 20min                                |
| S14-01 | f      | 78  | 17   | Dronabinol                   | o           | 2 doses of 2 to 3 drops each                                            | 3.52-5.28 mg                                               | 2-3 drops (1.76-2.64 mg THC)                          | 1h 20min                                |
| S15-01 | m      | 76  | 23   | Dronabinol                   | o           | 5 - 0 - 5 drops                                                         | 8.80 mg                                                    | 5 drops (4.4 mg THC)                                  | 1h 40min                                |
| S15-02 | m      | 76  | 22   | Dronabinol                   | o           | 2 doses to 6 to 8 drops each                                            | 10.56-14.08 mg                                             | 6-8 drops (5.28-7.04 mg THC)                          | 3h 20min                                |
| S16-01 | m      | 59  | 31   | Dronabinol                   | o           | 4 - 0 - 0 drops                                                         | 3.52 mg                                                    | 4 drops (3.52 mg THC)                                 | 23h 40min                               |
| S16-02 | m      | 60  | 31   | Dronabinol                   | o           | 6 - 0 - 0 drops                                                         | 5.28 mg                                                    | 6 drops (5.28 mg THC)                                 | 24h 30min                               |
| S16-03 | m      | 60  | 31   | Dronabinol                   | o           | 6 - 0 - 0 drops                                                         | 5.28 mg                                                    | 6 drops (5.28 mg THC)                                 | 3h 17min                                |

Table S1. Cont.

| Sample | Gender | Age | BMI* | Substance intake      | Application | Dosing regimen per day              | Approx. daily dose of THC [mg]** | Last dose before blood draw (respective THC quantity) | Time between last intake and blood draw |
|--------|--------|-----|------|-----------------------|-------------|-------------------------------------|----------------------------------|-------------------------------------------------------|-----------------------------------------|
| S17-01 | f      | 54  | 24   | Dronabinol            | o           | 5 - 0 - 10 drops                    | 13.2 mg                          | 5 drops (4.4 mg THC)                                  | 6h 20min                                |
| S17-02 | f      | 55  | 24   | Dronabinol            | o           | 3 - 0 - 10 drops                    | 11.44 mg                         | 3 drops (2.64 mg THC)                                 | 6h 45min                                |
| S17-03 | f      | 55  | 24   | Dronabinol            | o           | 0 - 0 - 5 drops                     | 4.4 mg                           | 5 drops (4.4 mg THC)                                  | 15h 6min                                |
| S17-04 | f      | 55  | 24   | Dronabinol            | o           | 0 - 0 - 5 drops                     | 4.4 mg                           | 5 drops (4.4 mg THC)                                  | 15h 30min                               |
| S17-05 | f      | 55  | 24   | Dronabinol            | o           | 0 - 0 - 5 drops                     | 4.4 mg                           | 5 drops (4.4 mg THC)                                  | 15h 25min                               |
| S18-01 | f      | 64  | 15   | Dronabinol            | o           | 5 - 5 - 5 drops                     | 13.2 mg                          | 5 drops (4.4 mg THC)                                  | 2h 5min                                 |
| S19-01 | f      | 64  | 20   | Dronabinol            | o           | 6 - 6 - 6 drops                     | 15.84 mg                         | 6 drops (5.28 mg THC)                                 | 1h                                      |
| S19-02 | f      | 64  | 20   | Dronabinol            | o           | ‘intake discontinued for some days’ | M.D.                             | M.D.                                                  | M.D.                                    |
| S20-01 | f      | 46  | 24   | Dronabinol            | o           | 2 - 0 - 2 drops                     | 3.52 mg                          | 2 drops (1.76 mg THC)                                 | 1 to 1,5h                               |
| S21-01 | f      | 56  | 25   | Dronabinol            | o           | 5 - 5 - 5 drops                     | 13.2 mg                          | 5 drops (4.4 mg THC)                                  | 3h 24min                                |
| S22-01 | f      | 55  | 33   | Dronabinol            | o           | 0 - 0 - 4 drops                     | 3.52 mg                          | 4 drops (3.52 mg THC)                                 | 13h 54min                               |
| S23-01 | f      | 44  | 23   | Dr. Nice CBD capsules | o           | 0 - 0 - 1 capsule                   | 1.64 mg                          | 1 capsule (1.64 mg)                                   | 14h 15min                               |

\* f = female, m = male, BMI = body mass index, om = oromucosal, v = vaporized, s = smoked, o = oral, M.D. = missing data

\*\* 3 doses were applied in the morning, 0 doses at noon/afternoon and 3 doses in the evening

\*\*\* Calculated as follows: 1 spray Sativex  $\triangleq$  2.7 mg THC [7], Pedanios 22/1  $\triangleq$  22% THC [41], Bedrocan  $\triangleq$  22% THC, Bediol  $\triangleq$  6.3% THC, Bedrolite  $\triangleq$  0.99% (<1.0%) THC, Bedrobinol  $\triangleq$  13.5% THC [42], 1 drop of Dronabinol  $\triangleq$  0.88 mg THC [43], 1 Dr. Nice CBD capsule  $\triangleq$  1.64 mg THC (Extract in the capsules contains 34.4 mg CBD/g and 1.88 mg THC/g [17]. 1 capsule contains at least 30 mg CBD, which equals approx. 30 mg CBD / 34.4 mg CBD/g extract = 0.87g. 0.87g extract  $\triangleq$  0.87 g \* 1.88 mg THC/g = 1.64 mg THC).

**Table S2.** Cannabinoid concentrations of forensic serum samples analyzed in a previous study [16] in [ng/mL]

| Sample | Substance intake | THC     | THC-OH | THC-COOH | THCAA | CBD     | CBDA      | CBN      | CBNA     | CBG     | CBGA     | CBC    | CBCA     | CBL  | CBLA     | THCV    | THCVA   | CBDV | CBDVA    |
|--------|------------------|---------|--------|----------|-------|---------|-----------|----------|----------|---------|----------|--------|----------|------|----------|---------|---------|------|----------|
| F01    | Street cannabis  | 10      | 2.9    | 27       | 10    | nd      | (0.0028)* | 0.22     | 0.018    | 0.44    | 0.51     | 1.3    | 0.75     | nd   | 0.010    | (0.032) | 1.7     | nd   | nd       |
| F02    | Street cannabis  | 42      | 14     | 180      | 9.8   | 0.55    | nd        | 1.9      | 0.089    | 0.85    | 0.13     | 4.4    | 0.20     | nd   | nd       | 0.24    | 1.0     | nd   | nd       |
| F03    | Street cannabis  | 0.36    | 0.44   | 8.3      | 0.24  | 0.40    | 0.12      | 0.015    | 0.034    | nd      | 0.037    | 0.20   | 0.035    | nd   | nd       | nd      | 0.16    | nd   | (0.0063) |
| F04    | Street cannabis  | 1.3     | 1.0    | 18       | 0.27  | (0.054) | nd        | 0.042    | (0.0044) | (0.055) | 0.022    | 0.20   | nd       | nd   | nd       | nd      | 0.28    | nd   | nd       |
| F05    | Street cannabis  | 4.0     | 1.5    | 22       | 0.26  | 0.57    | 0.011     | 0.52     | (0.0092) | 0.17    | 0.031    | 0.52   | (0.018)  | nd   | nd       | (0.048) | 0.45    | nd   | nd       |
| F06    | Street cannabis  | 1.2     | 0.76   | 8.6      | 0.078 | (0.042) | nd        | 0.044    | (0.0061) | (0.040) | (0.013)  | 0.26   | (0.0080) | nd   | nd       | nd      | 0.18    | nd   | nd       |
| F07    | Street cannabis  | 0.20    | nd     | 10       | 0.020 | nd      | nd        | (0.0055) | nd       | nd      | nd       | nd     | nd       | nd   | nd       | nd      | 0.040   | nd   | nd       |
| F08    | Street cannabis  | 2.0     | 1.0    | 14       | 0.28  | (0.050) | nd        | 0.094    | (0.0057) | (0.062) | (0.0084) | 0.20   | (0.014)  | nd   | nd       | nd      | 0.075   | nd   | nd       |
| F09    | Street cannabis  | 0.82    | 0.78   | 15       | 0.056 | nd      | nd        | 0.024    | (0.0038) | nd      | nd       | (0.10) | nd       | nd   | nd       | nd      | 0.070   | nd   | nd       |
| F10    | Street cannabis  | 1.2     | (0.26) | 4.1      | 0.12  | nd      | nd        | 0.031    | (0.0082) | (0.048) | nd       | nd     | nd       | nd   | nd       | nd      | 0.052   | nd   | nd       |
| F11    | Street cannabis  | 3.5     | 1.1    | 25       | 0.66  | nd      | nd        | 0.11     | (0.015)  | 0.15    | 0.024    | 0.34   | (0.015)  | nd   | nd       | nd      | 0.27    | nd   | nd       |
| F12    | Street cannabis  | 1.1     | 0.81   | 47       | 0.15  | nd      | nd        | 0.023    | (0.0064) | (0.058) | 0.023    | (0.10) | (0.0099) | nd   | nd       | nd      | 0.077   | nd   | nd       |
| F13    | Street cannabis  | 0.68    | 0.40   | 7.4      | 0.043 | 0.17    | nd        | 0.041    | (0.0069) | nd      | (0.0093) | (0.10) | (0.0094) | nd   | nd       | nd      | 0.041   | nd   | nd       |
| F14    | Street cannabis  | 0.83    | 0.77   | 19       | 0.068 | nd      | nd        | 0.012    | (0.011)  | nd      | (0.0093) | (0.10) | nd       | nd   | nd       | nd      | 0.063   | nd   | nd       |
| F15    | Street cannabis  | 0.60    | 0.40   | 2.0      | 0.028 | nd      | nd        | 0.031    | (0.0059) | nd      | nd       | (0.10) | nd       | nd   | nd       | nd      | (0.027) | nd   | nd       |
| F16    | Street cannabis  | 0.45    | nd     | 3.0      | 0.047 | nd      | nd        | 0.013    | (0.0060) | nd      | nd       | nd     | nd       | nd   | nd       | nd      | 0.047   | nd   | nd       |
| F17    | Street cannabis  | 13      | 17     | 180      | 9.9   | 0.42    | 0.024     | 0.30     | 0.023    | 0.26    | 0.41     | 1.7    | 0.15     | nd   | 0.010    | (0.020) | 0.78    | nd   | nd       |
| F18    | Street cannabis  | 55      | 9.3    | 160      | 64    | 0.14    | 0.0059    | 1.6      | 0.18     | 1.4     | 1.7      | 5.6    | 3.1      | 0.19 | 0.011    | 0.71    | 51      | nd   | nd       |
| F19    | Street cannabis  | 31      | 21     | 170      | 11    | 0.13    | nd        | 0.51     | 0.027    | 1.8     | 0.74     | 2.3    | 0.25     | nd   | 0.010    | 0.20    | 2.3     | nd   | nd       |
| F20    | Street cannabis  | 26      | 12     | 190      | 19    | nd      | nd        | 0.51     | 0.056    | 1.7     | 2.0      | 2.3    | 0.59     | nd   | 0.013    | (0.15)  | 1.4     | nd   | nd       |
| F21    | Street cannabis  | (0.055) | nd     | 2.9      | 0.23  | nd      | nd        | 0.010    | nd       | nd      | (0.013)  | nd     | (0.026)  | nd   | (0.0022) | nd      | 1.5     | nd   | nd       |
| F22    | Street cannabis  | 3.3     | 2.0    | 26       | 0.47  | nd      | nd        | 0.077    | (0.015)  | 0.25    | 0.083    | 0.60   | 0.054    | nd   | nd       | nd      | 0.21    | nd   | nd       |
| F23    | Street cannabis  | 0.31    | (0.20) | (1.2)    | 0.070 | nd      | nd        | 0.0085   | (0.0056) | nd      | (0.011)  | nd     | (0.012)  | nd   | nd       | nd      | (0.033) | nd   | nd       |
| F24    | Street cannabis  | 0.75    | (0.35) | 11       | 0.065 | nd      | nd        | 0.042    | (0.0073) | nd      | (0.0092) | (0.10) | nd       | nd   | nd       | nd      | 0.063   | nd   | nd       |

Table S2. Cont.

| Sample | Substance intake | THC  | THC-OH | THC-COOH | THCAA    | CBD     | CBDA     | CBN      | CBNA     | CBG     | CBGA     | CBC    | CBCA     | CBL     | CBLA     | THCV    | THCVA   | CBDV | CBDVA |
|--------|------------------|------|--------|----------|----------|---------|----------|----------|----------|---------|----------|--------|----------|---------|----------|---------|---------|------|-------|
| F25    | Street cannabis  | 0.24 | nd     | 3.0      | 0.033    | nd      | nd       | 0.0094   | 0.016    | nd      | nd       | nd     | nd       | nd      | nd       | nd      | 0.042   | nd   | nd    |
| F26    | Street cannabis  | 3.7  | 2.7    | 93       | 0.27     | nd      | nd       | 0.18     | 0.025    | (0.075) | 0.034    | 0.52   | (0.025)  | (0.071) | (0.0020) | nd      | 2.2     | nd   | nd    |
| F27    | Street cannabis  | 3.2  | 2.8    | 80       | 7.0      | 1.5     | 0.15     | 0.097    | 0.020    | (0.066) | 0.28     | 0.51   | 0.17     | nd      | (0.0048) | nd      | 0.79    | nd   | nd    |
| F28    | Street cannabis  | 0.81 | 0.46   | 19       | 0.64     | nd      | (0.0022) | 0.021    | 0.028    | nd      | 0.021    | nd     | (0.021)  | nd      | nd       | nd      | 0.073   | nd   | nd    |
| F29    | Street cannabis  | 1.3  | 1.8    | 38       | 0.048    | (0.069) | nd       | 0.062    | (0.0051) | nd      | (0.014)  | (0.10) | nd       | nd      | nd       | nd      | (0.033) | nd   | nd    |
| F30    | Street cannabis  | 1.7  | 1.3    | 51       | 0.32     | nd      | nd       | 0.030    | (0.0069) | 0.083   | (0.011)  | 0.20   | (0.017)  | nd      | nd       | nd      | 0.088   | nd   | nd    |
| F31    | Street cannabis  | 0.63 | (0.33) | 21       | (0.0099) | nd      | nd       | 0.0080   | (0.0061) | nd      | nd       | nd     | nd       | nd      | nd       | nd      | 0.049   | nd   | nd    |
| F32    | Street cannabis  | 2.5  | 1.9    | 28       | 2.7      | nd      | nd       | 0.042    | (0.0083) | 0.10    | 0.10     | 0.22   | (0.026)  | nd      | nd       | nd      | 0.95    | nd   | nd    |
| F33    | Street cannabis  | 0.41 | nd     | 3.0      | 0.18     | nd      | nd       | (0.0053) | (0.0040) | nd      | nd       | nd     | nd       | nd      | nd       | nd      | 0.13    | nd   | nd    |
| F34    | Street cannabis  | 0.47 | (0.27) | 3.7      | 0.026    | nd      | nd       | 0.0091   | (0.0044) | nd      | nd       | nd     | nd       | nd      | nd       | nd      | 0.81    | nd   | nd    |
| F35    | Street cannabis  | 2.5  | 0.78   | 40       | 0.090    | nd      | nd       | 0.056    | nd       | (0.040) | nd       | (0.11) | nd       | nd      | nd       | nd      | 0.52    | nd   | nd    |
| F36    | Street cannabis  | 0.94 | 0.54   | 20       | 0.035    | nd      | nd       | 0.026    | nd       | nd      | nd       | (0.10) | nd       | nd      | nd       | nd      | 0.64    | nd   | nd    |
| F37    | Street cannabis  | 0.34 | nd     | 2.0      | (0.0095) | nd      | nd       | (0.0067) | (0.0041) | nd      | nd       | nd     | nd       | nd      | nd       | nd      | 0.12    | nd   | nd    |
| F38    | Street cannabis  | 1.6  | 0.93   | 32       | 0.092    | nd      | nd       | 0.038    | (0.0052) | 0.076   | nd       | (0.10) | nd       | nd      | nd       | (0.021) | 0.42    | nd   | nd    |
| F39    | Street cannabis  | 0.80 | 0.40   | 7.7      | 0.029    | nd      | nd       | 0.022    | (0.0050) | nd      | nd       | (0.10) | nd       | nd      | nd       | (0.020) | 0.27    | nd   | nd    |
| F40    | Street cannabis  | 0.28 | nd     | 3.0      | (0.0059) | nd      | nd       | (0.0041) | nd       | nd      | nd       | nd     | nd       | nd      | nd       | nd      | 0.16    | nd   | nd    |
| F41    | Street cannabis  | 0.61 | (0.27) | 4.4      | (0.012)  | nd      | nd       | 0.011    | (0.0060) | (0.040) | nd       | nd     | nd       | nd      | nd       | nd      | 0.11    | nd   | nd    |
| F42    | Street cannabis  | 0.44 | 0.40   | (1.0)    | 0.029    | nd      | nd       | (0.0027) | nd       | nd      | nd       | nd     | nd       | nd      | nd       | nd      | 0.067   | nd   | nd    |
| F43    | Street cannabis  | 8.6  | 5.3    | 200      | 0.031    | 0.47    | (0.0029) | 0.19     | (0.0052) | 0.31    | (0.014)  | 0.20   | (0.0080) | nd      | nd       | (0.10)  | 0.65    | nd   | nd    |
| F44    | Street cannabis  | 0.47 | (0.20) | 4.6      | (0.0013) | nd      | nd       | 0.018    | (0.0047) | (0.040) | nd       | nd     | nd       | nd      | nd       | nd      | 0.16    | nd   | nd    |
| F45    | Street cannabis  | 0.60 | 0.40   | 11       | 0.16     | nd      | nd       | 0.011    | nd       | nd      | nd       | nd     | nd       | nd      | nd       | nd      | 0.19    | nd   | nd    |
| F46    | Street cannabis  | 0.64 | 0.41   | 3.0      | 0.22     | nd      | nd       | 0.012    | nd       | nd      | (0.0093) | nd     | (0.0090) | nd      | nd       | nd      | 0.53    | nd   | nd    |
| F47    | Street cannabis  | 1.0  | (0.30) | 3.9      | 0.021    | nd      | nd       | 0.024    | (0.0043) | (0.058) | nd       | nd     | nd       | nd      | nd       | nd      | 0.046   | nd   | nd    |
| F48    | Street cannabis  | 0.46 | (0.25) | 3.7      | 0.031    | nd      | nd       | 0.0092   | nd       | nd      | nd       | nd     | nd       | nd      | nd       | nd      | 0.11    | nd   | nd    |

Table S2. Cont.

| Sample | Substance intake | THC  | THC-OH | THC-COOH | THCAA   | CBD | CBDA | CBN      | CBNA     | CBG | CBGA     | CBC | CBCA    | CBL | CBLA | THCV | THCVA | CBDV | CBDVA |
|--------|------------------|------|--------|----------|---------|-----|------|----------|----------|-----|----------|-----|---------|-----|------|------|-------|------|-------|
| F49    | Street cannabis  | 0.89 | 0.40   | 7.1      | 0.027   | nd  | nd   | 0.012    | nd       | nd  | nd       | nd  | nd      | nd  | nd   | nd   | 0.35  | nd   | nd    |
| F50    | Street cannabis  | 0.20 | nd     | (1.0)    | 0.44    | nd  | nd   | (0.0018) | 0.017    | nd  | nd       | nd  | (0.012) | nd  | nd   | nd   | 0.20  | nd   | nd    |
| F51    | Street cannabis  | 0.45 | nd     | 5.4      | 0.028   | nd  | nd   | 0.010    | (0.0041) | nd  | nd       | nd  | nd      | nd  | nd   | nd   | 0.13  | nd   | nd    |
| F52    | Street cannabis  | 0.29 | (0.20) | 2.0      | (0.010) | nd  | nd   | (0.0060) | nd       | nd  | nd       | nd  | nd      | nd  | nd   | nd   | 0.049 | nd   | nd    |
| F53    | Street cannabis  | 0.37 | (0.20) | 5.5      | 0.020   | nd  | nd   | 0.022    | nd       | nd  | nd       | nd  | nd      | nd  | nd   | nd   | 0.076 | nd   | nd    |
| F54    | Street cannabis  | 0.20 | nd     | (1.0)    | 0.13    | nd  | nd   | (0.0013) | nd       | nd  | (0.0096) | nd  | nd      | nd  | nd   | nd   | 0.045 | nd   | nd    |
| F55    | Street cannabis  | 0.56 | (0.30) | 7.5      | 0.13    | nd  | nd   | 0.010    | nd       | nd  | 0.020    | nd  | nd      | nd  | nd   | nd   | 0.25  | nd   | nd    |

\* Measured values <LOQ are reported as approximate values in parentheses, nd = not detected/ below limit of detection



**Table S3.** Cannabinoid serum concentrations of study and forensic serum samples standardized on THC (Cannabinoid ratios)

[illegible]

Table S3. Cont.

| Sample | Substance intake                | $\frac{THC - OH}{THC}$ | $\frac{THC - COOH}{THC}$ | $\frac{THCAA}{THC}$ | $\frac{CBD}{THC}$ | $\frac{CBDA}{THC}$ | $\frac{CBN}{THC}$ | $\frac{CBNA}{THC}$ | $\frac{CBG}{THC}$ | $\frac{CBGA}{THC}$ | $\frac{CBC}{THC}$ | $\frac{CBCA}{THC}$ | $\frac{CBL}{THC}$ | $\frac{CBLA}{THC}$ | $\frac{THCV}{THC}$ | $\frac{THCVA}{THC}$ | $\frac{CBDVA}{THC}$ |
|--------|---------------------------------|------------------------|--------------------------|---------------------|-------------------|--------------------|-------------------|--------------------|-------------------|--------------------|-------------------|--------------------|-------------------|--------------------|--------------------|---------------------|---------------------|
| S09-01 | Bedrocan                        | 1.08                   | 28.2                     | 0.0239              | 0.0923            | 0.0162             | 0.0462            | 0                  | 0                 | 0.0564             | 0                 | 0                  | 0                 | 0                  | 0                  | 0.949               | 0                   |
| S09-02 | Bedrocan                        | 0.643                  | 15.2                     | 0.112               | 0                 | 0.00476            | 0.0286            | 0                  | 0                 | 0.0571             | 0                 | 0                  | 0                 | 0                  | 0                  | 0.548               | 0                   |
| S09-03 | Bedrocan                        | 0                      | 12.9                     | 0.112               | 0                 | 0                  | 0.112             | 0                  | 0                 | 0                  | 0                 | 0                  | 0                 | 0                  | 0                  | 1.59                | 0                   |
| S10-01 | Bedrobinol                      | 0                      | 0                        | 0.0600              | 0                 | 0                  | 0.0180            | 0                  | 0                 | 0                  | 0                 | 0                  | 0                 | 0                  | 0                  | 0.0435              | 0                   |
| S10-02 | Bedrobinol                      | 0.405                  | 3.78                     | 0.238               | 0.0235            | 0                  | 0.0676            | 0                  | 0.0243            | 0.00892            | 0.173             | 0.00784            | 0                 | 0                  | 0                  | 0.0566              | 0                   |
| S10-03 | Bedrobinol                      | 0.426                  | 4.26                     | 0.277               | 0.0162            | 0                  | 0.0383            | 0                  | 0.0168            | 0.0115             | 0.181             | 0.0117             | 0                 | 0                  | 0                  | 0.119               | 0                   |
| S10-04 | Bedrobinol                      | 0.524                  | 4.00                     | 0.214               | 0.0348            | 0                  | 0.0571            | 0                  | 0.0219            | 0.00524            | 0.129             | 0.0110             | 0                 | 0                  | 0                  | 0.133               | 0                   |
| S11-01 | Dronabinol +<br>Street cannabis | 1.19                   | 25.0                     | 0.0191              | 0                 | 0                  | 0.0321            | 0                  | 0                 | 0.00976            | 0.179             | 0                  | 0                 | 0.00250            | 0                  | 0.345               | 0                   |
| S11-02 | Dronabinol +<br>Street cannabis | 0.714                  | 15.0                     | 0.121               | 0                 | 0                  | 0.0207            | 0.00350            | 0.0407            | 0.0171             | 0.129             | 0.00929            | 0                 | 0                  | 0                  | 1.64                | 0                   |
| S11-03 | Dronabinol +<br>Street cannabis | 0.634                  | 6.10                     | 0.268               | 0                 | 0                  | 0.0342            | 0.0110             | 0                 | 0.0293             | 0                 | 0.0268             | 0                 | 0.00585            | 0                  | 0.756               | 0                   |
| S11-04 | Dronabinol +<br>Street cannabis | 0.575                  | 15.8                     | 0.0917              | 0                 | 0                  | 0.0267            | 0                  | 0.0467            | 0.0125             | 0.225             | 0.00833            | 0                 | 0.00192            | 0                  | 0.333               | 0                   |
| S12-01 | Dronabinol+Street<br>cannabis   | 0.482                  | 26.4                     | 0.0600              | 0                 | 0                  | 0.0318            | 0                  | 0.0755            | 0.0127             | 0.118             | 0.00227            | 0                 | 0                  | 0                  | 0.0709              | 0                   |
| S12-02 | Dronabinol+Street<br>cannabis   | 0.750                  | 13.1                     | 0.0488              | 0.00275           | 0                  | 0.0294            | 0.00125            | 0.0413            | 0.00688            | 0.0750            | 0.00200            | 0                 | 0                  | 0                  | 0.106               | 0                   |
| S13-01 | Dronabinol                      | 3.96                   | 47.9                     | 0.00104             | 0                 | 0                  | 0                 | 0                  | 0                 | 0.0190             | 0                 | 0                  | 0                 | 0                  | 0                  | 0                   | 0                   |
| S14-01 | Dronabinol                      | 1.13                   | 19.5                     | 0.000488            | 0                 | 0                  | 0.00927           | 0                  | 0                 | 0                  | 0                 | 0                  | 0                 | 0                  | 0                  | 0.220               | 0                   |
| S15-01 | Dronabinol                      | 3.12                   | 76.5                     | 0                   | 0                 | 0                  | 0                 | 0                  | 0                 | 0                  | 0                 | 0                  | 0                 | 0                  | 0                  | 0                   | 0                   |
| S15-02 | Dronabinol                      | 2                      | 29.0                     | 0                   | 0                 | 0                  | 0.00240           | 0                  | 0                 | 0.00850            | 0                 | 0                  | 0                 | 0                  | 0                  | 0                   | 0                   |

**Table S3. Cont.**

[illegible]

Table S3. Cont.

| Sample | Substance intake | $\frac{THC - OH}{THC}$ | $\frac{THC - COOH}{THC}$ | $\frac{THCAA}{THC}$ | $\frac{CBD}{THC}$ | $\frac{CBDA}{THC}$ | $\frac{CBN}{THC}$ | $\frac{CBNA}{THC}$ | $\frac{CBG}{THC}$ | $\frac{CBGA}{THC}$ | $\frac{CBC}{THC}$ | $\frac{CBCA}{THC}$ | $\frac{CBL}{THC}$ | $\frac{CBLA}{THC}$ | $\frac{THCV}{THC}$ | $\frac{THCVA}{THC}$ | $\frac{CBDVA}{THC}$ |
|--------|------------------|------------------------|--------------------------|---------------------|-------------------|--------------------|-------------------|--------------------|-------------------|--------------------|-------------------|--------------------|-------------------|--------------------|--------------------|---------------------|---------------------|
| F08    | Street cannabis  | 0.500                  | 7.00                     | 0.140               | 0.0250            | 0                  | 0.0470            | 0.00285            | 0.0310            | 0.00420            | 0.100             | 0.00700            | 0                 | 0                  | 0                  | 0.0375              | 0                   |
| F09    | Street cannabis  | 0.951                  | 18.3                     | 0.0683              | 0                 | 0                  | 0.0293            | 0.00463            | 0                 | 0                  | 0.122             | 0                  | 0                 | 0                  | 0                  | 0.0854              | 0                   |
| F10    | Street cannabis  | 0.217                  | 3.42                     | 0.100               | 0                 | 0                  | 0.0258            | 0.00683            | 0.0400            | 0                  | 0                 | 0                  | 0                 | 0                  | 0                  | 0.0433              | 0                   |
| F11    | Street cannabis  | 0.314                  | 7.14                     | 0.189               | 0                 | 0                  | 0.0314            | 0.00429            | 0.0429            | 0.00686            | 0.0971            | 0.00429            | 0                 | 0                  | 0                  | 0.0771              | 0                   |
| F12    | Street cannabis  | 0.736                  | 42.7                     | 0.136               | 0                 | 0                  | 0.0209            | 0.00582            | 0.0527            | 0.0209             | 0.0909            | 0.00900            | 0                 | 0                  | 0                  | 0.0700              | 0                   |
| F13    | Street cannabis  | 0.588                  | 10.9                     | 0.0632              | 0.250             | 0                  | 0.0603            | 0.0102             | 0                 | 0.0137             | 0.147             | 0.0138             | 0                 | 0                  | 0                  | 0.0603              | 0                   |
| F14    | Street cannabis  | 0.928                  | 22.9                     | 0.0819              | 0                 | 0                  | 0.0145            | 0.0133             | 0                 | 0.0112             | 0.121             | 0                  | 0                 | 0                  | 0                  | 0.0759              | 0                   |
| F15    | Street cannabis  | 0.667                  | 3.33                     | 0.0467              | 0                 | 0                  | 0.0517            | 0.00983            | 0                 | 0                  | 0.167             | 0                  | 0                 | 0                  | 0                  | 0.0450              | 0                   |
| F16    | Street cannabis  | 0                      | 6.67                     | 0.104               | 0                 | 0                  | 0.0289            | 0.0133             | 0                 | 0                  | 0                 | 0                  | 0                 | 0                  | 0                  | 0.104               | 0                   |
| F17    | Street cannabis  | 1.31                   | 13.9                     | 0.762               | 0.0323            | 0.00185            | 0.0231            | 0.00177            | 0.0200            | 0.0315             | 0.131             | 0.0115             | 0                 | 0.000769           | 0.00154            | 0.0600              | 0                   |
| F18    | Street cannabis  | 0.169                  | 2.91                     | 1.16                | 0.00255           | 0.000107           | 0.0291            | 0.00327            | 0.0255            | 0.0309             | 0.102             | 0.0564             | 0.00346           | 0.000200           | 0.0129             | 0.927               | 0                   |
| F19    | Street cannabis  | 0.677                  | 5.48                     | 0.355               | 0.00419           | 0                  | 0.0165            | 0.000871           | 0.0581            | 0.0239             | 0.0742            | 0.00807            | 0                 | 0.000323           | 0.00645            | 0.0742              | 0                   |
| F20    | Street cannabis  | 0.462                  | 7.31                     | 0.731               | 0                 | 0                  | 0.0196            | 0.00215            | 0.0654            | 0.0769             | 0.0885            | 0.0227             | 0                 | 0.000500           | 0.00577            | 0.0539              | 0                   |
| F21    | Street cannabis  | 0                      | 52.7                     | 4.18                | 0                 | 0                  | 0.182             | 0                  | 0                 | 0.236              | 0                 | 0.473              | 0                 | 0.0400             | 0                  | 27.3                | 0                   |
| F22    | Street cannabis  | 0.606                  | 7.88                     | 0.142               | 0                 | 0                  | 0.0233            | 0.00455            | 0.0758            | 0.0252             | 0.182             | 0.0164             | 0                 | 0                  | 0                  | 0.0636              | 0                   |
| F23    | Street cannabis  | 0.645                  | 3.87                     | 0.226               | 0                 | 0                  | 0.0274            | 0.0181             | 0                 | 0.0355             | 0                 | 0.0387             | 0                 | 0                  | 0                  | 0.107               | 0                   |
| F24    | Street cannabis  | 0.467                  | 14.7                     | 0.0867              | 0                 | 0                  | 0.0560            | 0.00973            | 0                 | 0.0123             | 0.133             | 0                  | 0                 | 0                  | 0                  | 0.0840              | 0                   |
| F25    | Street cannabis  | 0                      | 12.5                     | 0.138               | 0                 | 0                  | 0.0392            | 0.0667             | 0                 | 0                  | 0                 | 0                  | 0                 | 0                  | 0                  | 0.175               | 0                   |
| F26    | Street cannabis  | 0.730                  | 25.1                     | 0.0730              | 0                 | 0                  | 0.0487            | 0.00676            | 0.0203            | 0.00919            | 0.141             | 0.00676            | 0.0192            | 0.000541           | 0                  | 0.595               | 0                   |
| F27    | Street cannabis  | 0.875                  | 25.0                     | 2.19                | 0.469             | 0.0469             | 0.0303            | 0.00625            | 0.0206            | 0.0875             | 0.159             | 0.0531             | 0                 | 0.00150            | 0                  | 0.247               | 0                   |
| F28    | Street cannabis  | 0.568                  | 23.5                     | 0.790               | 0                 | 0.00272            | 0.0259            | 0.0346             | 0                 | 0.0259             | 0                 | 0.0259             | 0                 | 0                  | 0                  | 0.0901              | 0                   |
| F29    | Street cannabis  | 1.39                   | 29.2                     | 0.0369              | 0.0531            | 0                  | 0.0477            | 0.00392            | 0                 | 0.0108             | 0.0769            | 0                  | 0                 | 0                  | 0                  | 0.0254              | 0                   |

Table S3. Cont.

[illegible]

Table S3. Cont.

| Sample | Substance intake | $\frac{THC - OH}{THC}$ | $\frac{THC - COOH}{THC}$ | $\frac{THCAA}{THC}$ | $\frac{CBD}{THC}$ | $\frac{CBDA}{THC}$ | $\frac{CBN}{THC}$ | $\frac{CBNA}{THC}$ | $\frac{CBG}{THC}$ | $\frac{CBGA}{THC}$ | $\frac{CBC}{THC}$ | $\frac{CBCA}{THC}$ | $\frac{CBL}{THC}$ | $\frac{CBLA}{THC}$ | $\frac{THCV}{THC}$ | $\frac{THCVA}{THC}$ | $\frac{CBDVA}{THC}$ |
|--------|------------------|------------------------|--------------------------|---------------------|-------------------|--------------------|-------------------|--------------------|-------------------|--------------------|-------------------|--------------------|-------------------|--------------------|--------------------|---------------------|---------------------|
| F53    | Street cannabis  | 0.541                  | 14.9                     | 0.0541              | 0                 | 0                  | 0.0595            | 0                  | 0                 | 0                  | 0                 | 0                  | 0                 | 0                  | 0                  | 0.205               | 0                   |
| F54    | Street cannabis  | 0                      | 5.00                     | 0.650               | 0                 | 0                  | 0.00650           | 0                  | 0                 | 0.0480             | 0                 | 0                  | 0                 | 0                  | 0                  | 0.225               | 0                   |
| F55    | Street cannabis  | 0.536                  | 13.4                     | 0.232               | 0                 | 0                  | 0.0179            | 0                  | 0                 | 0.0357             | 0                 | 0                  | 0                 | 0                  | 0                  | 0.446               | 0                   |

Samples with THC concentrations <LOD were shaded grey. For other cannabinoid concentrations <LOD, 0 was substituted as a ratio.

**Table S4.** Cannabinoid serum concentrations of study and forensic serum samples standardized on THC (Cannabinoid ratios)

| Sample | Substance intake | $\frac{THC - OH}{THC}$ | $\frac{THC - COOH}{THC}$ | $\frac{THCAA}{THC}$ | $\frac{CBD}{THC}$ | $\frac{CBDA}{THC}$ | $\frac{CBN}{THC}$ | $\frac{CBNA}{THC}$ | $\frac{CBG}{THC}$ | $\frac{CBGA}{THC}$ | $\frac{CBC}{THC}$ | $\frac{CBCA}{THC}$ | $\frac{CBL}{THC}$ | $\frac{CBLA}{THC}$ | $\frac{THCV}{THC}$ | $\frac{THCVA}{THC}$ | $\frac{CBDVA}{THC}$ |
|--------|------------------|------------------------|--------------------------|---------------------|-------------------|--------------------|-------------------|--------------------|-------------------|--------------------|-------------------|--------------------|-------------------|--------------------|--------------------|---------------------|---------------------|
| Sat01  | Sativex          | 0.448                  | 13.8                     | 0.0483              | 0.135             | 0.00148            | 0.0414            | 0                  | 0.0379            | 0.00517            | 0.145             | 0                  | 0                 | 0                  | 0.0166             | 0.117               | 0                   |
| Sat02  | Sativex          | 0.508                  | 20.0                     | 0.262               | 0.231             | 0.0939             | 0.0246            | 0.00339            | 0.0339            | 0.00831            | 0.129             | 0.0152             | 0                 | 0                  | 0.00400            | 0.142               | 0                   |
| Sat03  | Sativex          | 0.711                  | 14.0                     | 0.316               | 0.0421            | 0.00368            | 0.0474            | 0.00474            | 0.0421            | 0.0124             | 0.121             | 0.00632            | 0                 | 0                  | 0.0211             | 0.158               | 0                   |
| Sat04  | Sativex          | 0.367                  | 4.67                     | 0.0225              | 0.117             | 0.000183           | 0.167             | 0.00417            | 0.0383            | 0.00225            | 0.150             | 0.00117            | 0                 | 0                  | 0.0150             | 0.0300              | 0                   |
| Dro01  | Dronabinol       | 0.417                  | 31.3                     | 0.0521              | 0.323             | 0                  | 0.125             | 0.0115             | 0.0500            | 0                  | 0.375             | 0                  | 0                 | 0                  | 0                  | 0.302               | 0                   |
| Dro02  | Dronabinol       | 0.231                  | 17.7                     | 0.0354              | 0                 | 0                  | 0.0408            | 0                  | 0.0923            | 0                  | 0.200             | 0.123              | 0                 | 0                  | 0                  | 0.200               | 0                   |
| Dro03  | Dronabinol       | 0.407                  | 17.0                     | 0.441               | 0.0107            | 0                  | 0.0322            | 0.00373            | 0.0593            | 0.0322             | 0.288             | 0.00661            | 0                 | 0                  | 0.0114             | 0.492               | 0                   |
| Dro04  | Dronabinol       | 1.58                   | 45.3                     | 0.0842              | 0                 | 0                  | 0.00790           | 0                  | 0                 | 0                  | 0                 | 0                  | 0                 | 0                  | 0                  | 0.163               | 0                   |
| THCM01 | THC medicine     | 0.238                  | 4.67                     | 0.0571              | 0.0410            | 0                  | 0.0214            | 0.00667            | 0.0371            | 0                  | 0.0905            | 0.00433            | 0                 | 0                  | 0                  | 0.414               | 0                   |

For cannabinoid concentrations <LOD, 0 was substituted as a ratio.

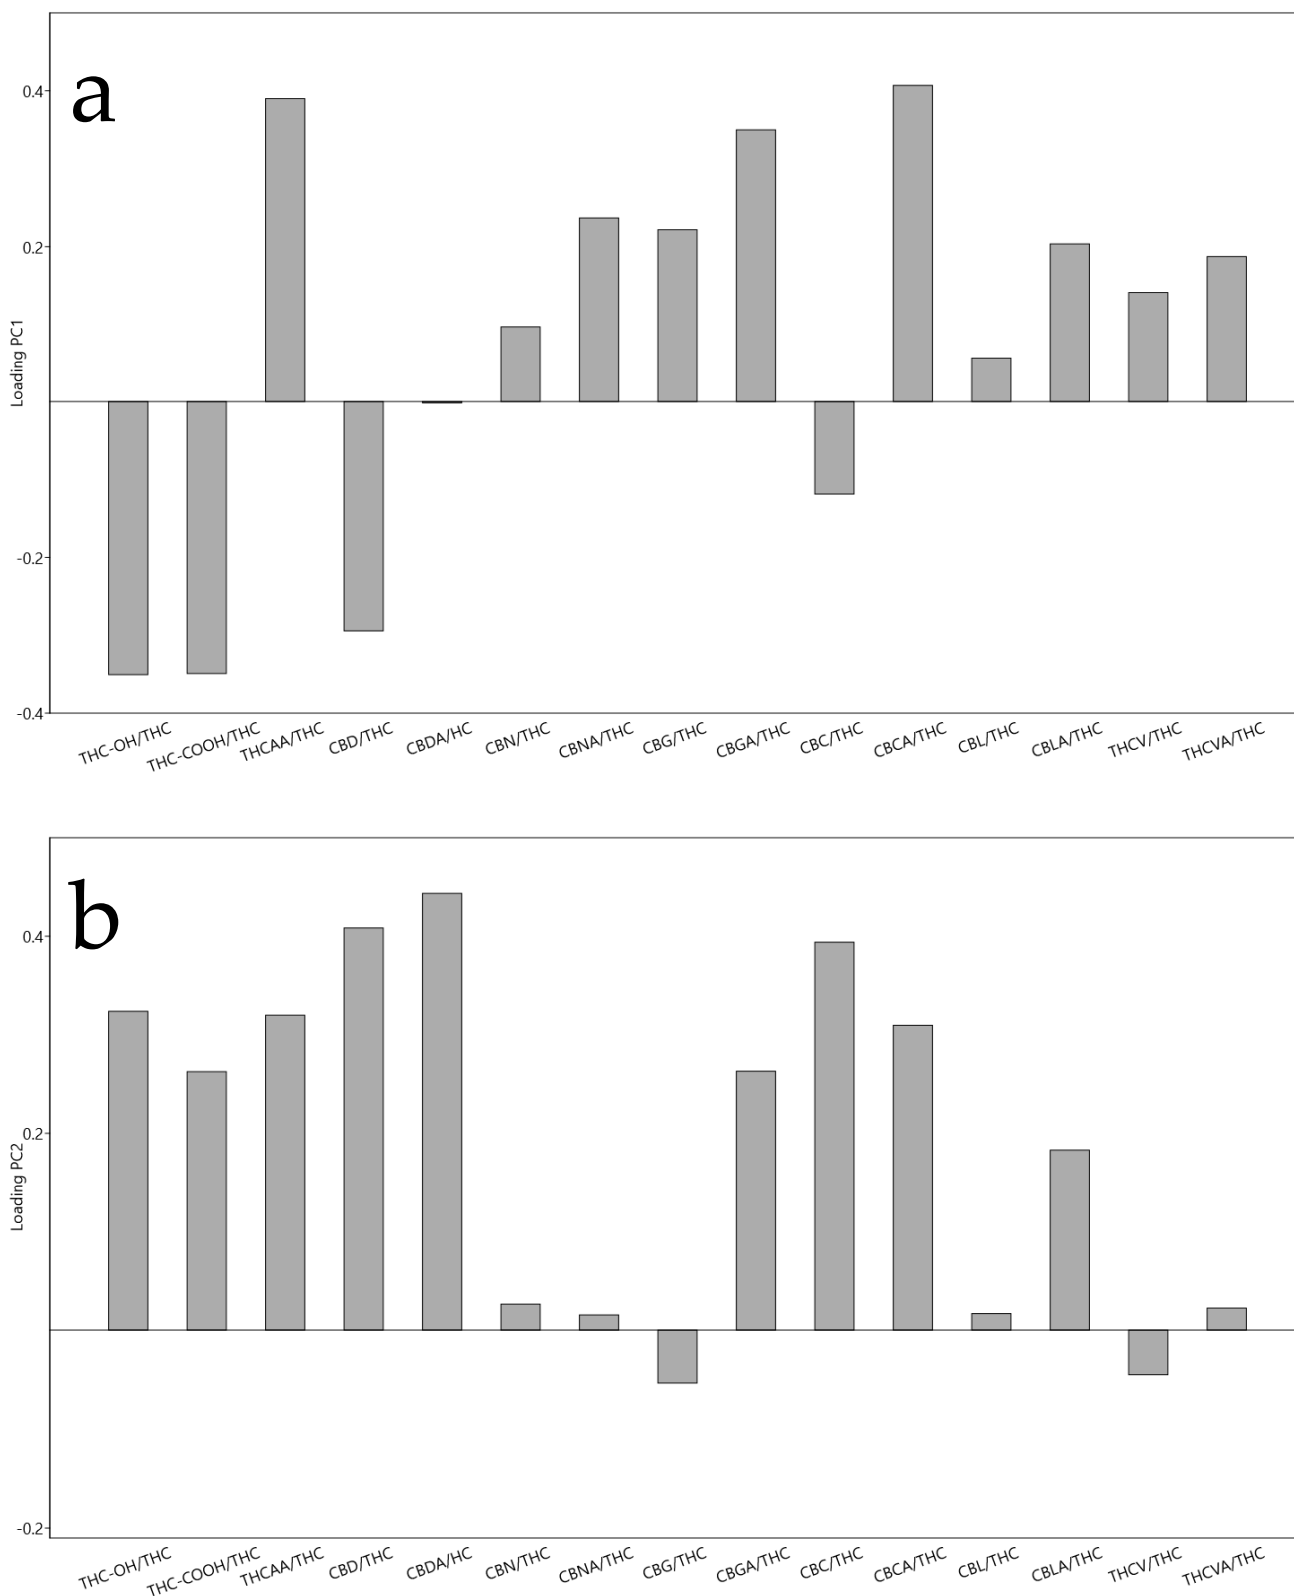

**Figure S1.** Loading plot of principal component (PC) 1 and PC 2 for PCA of study and forensic samples. PC 1 (a) has negative loadings for THC-OH/THC, THC-COOH/THC, CBD/THC and CBC/THC, while especially THCAA/THC, CBGA/THC and CBCA/THC are correlated positively. PC 2 (b) has positive loadings for most variables, except for CBG/THC and THCV/THC.



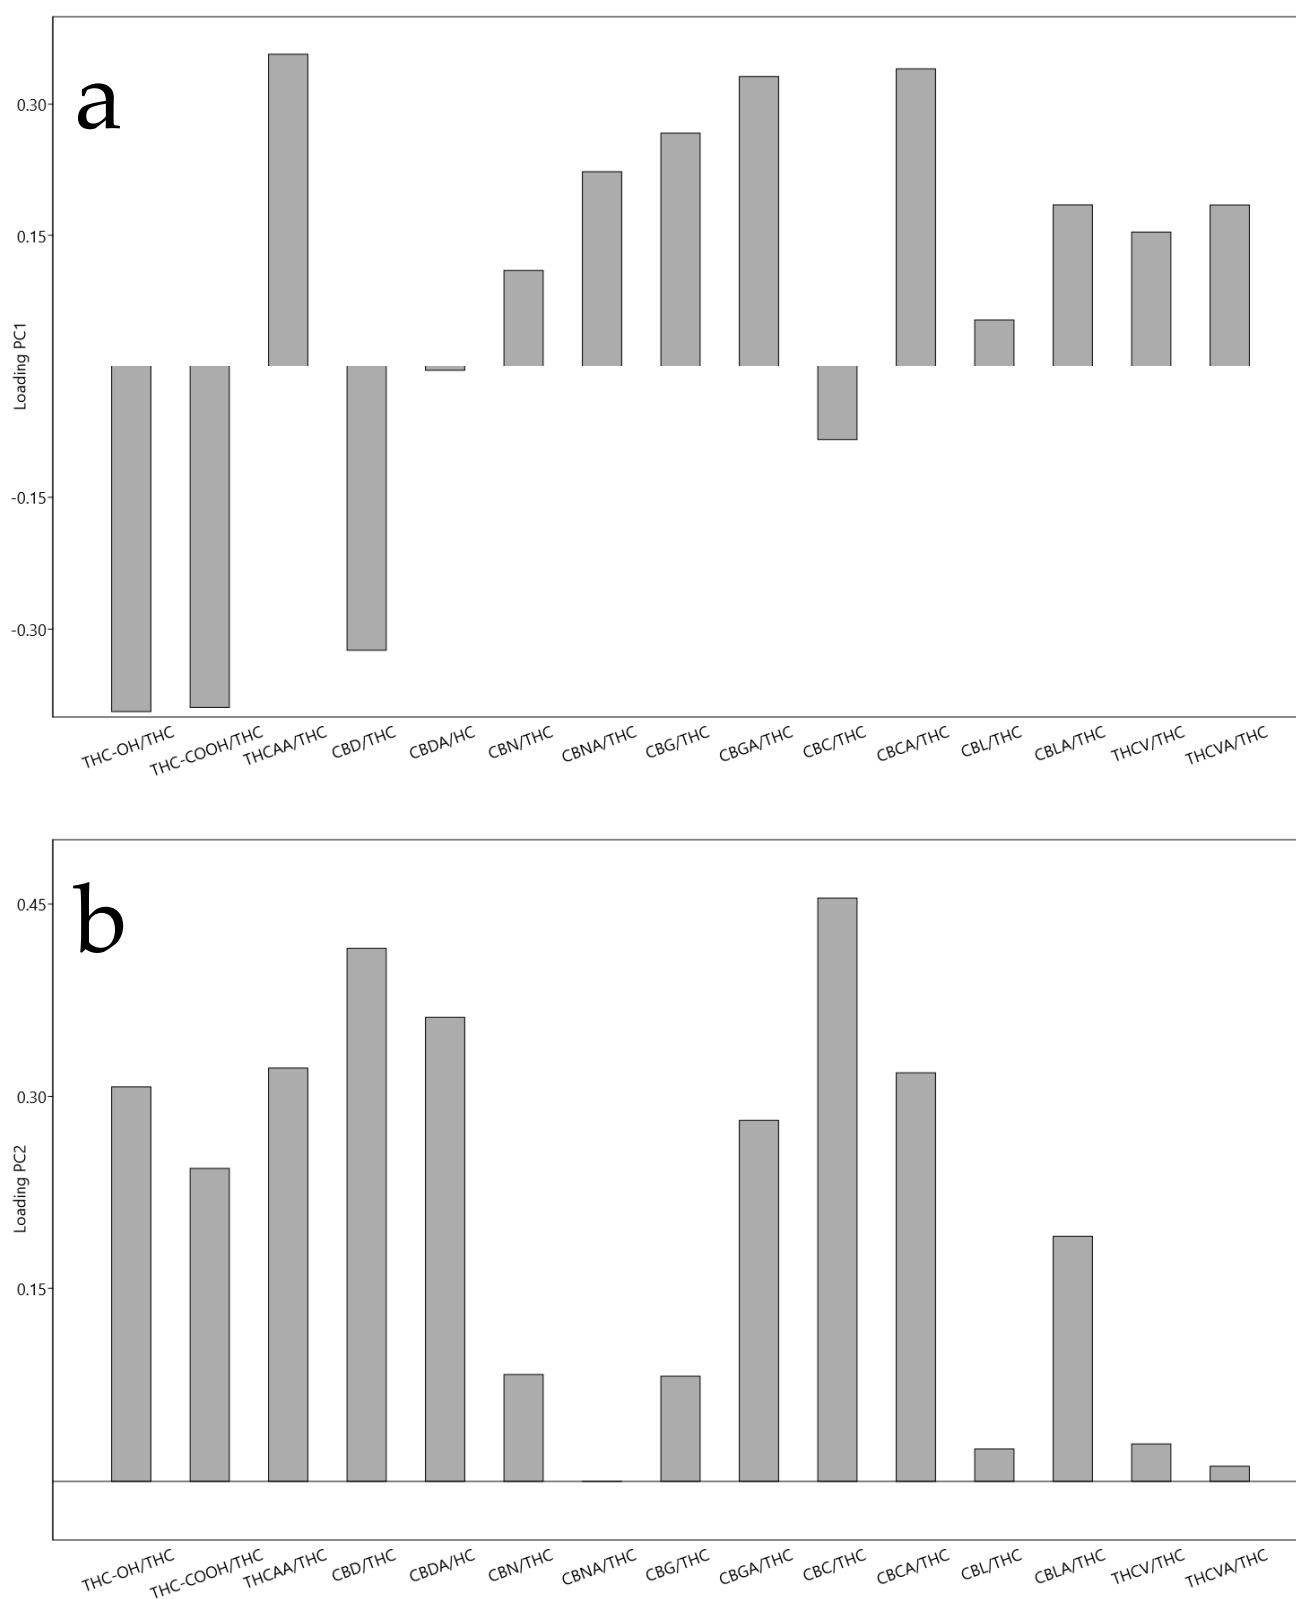

**Figure S2.** Loading plot of principal component (PC) 1 and PC 2 for PCA of study samples, forensic samples of street cannabis users and forensic samples with reported intake of cannabis-based medicines. Similar to supplementary Figure 1, PC 1 (a) has negative loadings for THC-OH/THC, THC-COOH/THC, CBD/THC and CBC/THC, while most other cannabinoids, especially THCAA/THC, CBGA/THC and CBCA/THC, are correlated positively. PC 2 (b) has positive loadings for almost all variables.
